1 **Letter:**

2 **Vascular plants are strong predictors of multi-taxon species richness**

3 *Running title: Vascular plants as biodiversity surrogate*

4 Ane Kirstine Brunbjerg<sup>1</sup>, Hans Henrik Bruun<sup>2</sup>, Lars Dalby<sup>1</sup>, Camilla Fløjgaard<sup>1</sup>, Tobias G.

5 Frøslev<sup>2</sup>, Toke Thomas Høye<sup>1</sup>, Irina Goldberg<sup>2</sup>, Thomas Læssøe<sup>2</sup>, Morten D. D. Hansen<sup>3</sup>, Lars

6 Brøndum<sup>3</sup>, Lars Skipper<sup>3</sup>, Kåre Fog<sup>3</sup>, Rasmus Ejrnæs<sup>1\*</sup>

7 <sup>1</sup> *Department of Bioscience, Aarhus University, 8410 Rønde, Denmark*

8 <sup>2</sup> *Department of Biology, University of Copenhagen, 2100 Copenhagen, Denmark*

9 <sup>3</sup> *Natural History Museum Aarhus, 8000 Aarhus C, Denmark*

10 \* Corresponding author: E-mail address: rasmus@bios.au.dk, mail-address: Section for

11 Biodiversity & Conservation, Department of Bioscience, Aarhus University, Grenåvej 14, 8410

12 Rønde, Kalø, Denmark, phone.: +45 87158853, fax: +45 87158902.

13 E-mail-addresses: AKB: akb@bios.au.dk, HHB: hhbruun@bio.ku.dk, LD: lars@bios.au.dk, CF:

14 camf@bios.au.dk, TGF: tobiasgf@bio.ku.dk, TTH: tth@bios.au.dk, IG:

15 irina.goldberg@gmail.com, TL: thomsal@bio.ku.dk, MDDH: mortendd@molslab.dk, LB:

16 lars@nathist.dk, LS: lars.skipper@get2net.dk, KF: kaarefog@teliamail.dk

17 ORCIDs: AKB: 0000-0003-0666-6535, HHB: 0000-0003-0674-2577, LD: 0000-0002-7270-

18 6999, CF: 0000-0002-5829-8503, TGF: 0000-0002-3530-013X, TTH: 0000-0001-5387-3284,

19 IG, TL, MDDH, LB, LS, KF, RE: 0000-0003-2538-8606

20 **Statement of authorship:** RE, AKB, TGF, HHB and TTH designed the study, All authors

21 except LD, TTH collected the data, TGF carried out the molecular and bioinformatic analyses,

22 AKB, LD, RE and TTH carried out the statistical analyses, AKB and RE wrote first draft, all

23 authors contributed to revising the paper.

- 24 **Keywords:** bryophytes, carabids, ecospace, fungi, gastropods, hoverflies, lichens,  
25 metabarcoding, spiders, surrogacy.  
26 Word count, abstract: 148  
27 Word count, main text: 4,918  
28 Number of references: 60  
29 Number of figures: 2  
30 Number of tables: 1  
31 Number of text boxes: 0

32 **Abstract:** Plants regulate soils and microclimate, provide substrate for heterotrophic taxa, are  
33 easy to observe and identify and have a stable taxonomy, which strongly justifies the use of  
34 plants as bioindicators in monitoring and conservation. However, insects and fungi make up the  
35 vast majority of species. Surprisingly, it remains untested whether plants are strong predictors of  
36 total multi-taxon species richness. To answer this question, we collected an extensive data set on  
37 species richness of vascular plants, bryophytes, macrofungi, lichens, plant-galling arthropods,  
38 gastropods, spiders, carabid beetles, hoverflies and OTU richness from environmental DNA  
39 metabarcoding. Plant species richness per se was a moderate predictor of richness of other taxa.  
40 Taking an ecospace approach to modelling, the addition of plant-derived bioindicators revealed  
41 1) a consistently positive effect of plant richness on other taxa, 2) prediction of 12-55% of  
42 variation in other taxa and 48 % of variation in the total species richness.

43

## 44 INTRODUCTION

45 The majority of species worldwide are still undescribed and nowhere on Earth are all the locally  
46 resident species known. Even for the vast majority of known species, their distribution range and  
47 population sizes remain unknown. As a result, understanding the causes of spatial variation in  
48 biological diversity represents a perpetual challenge for ecological science (Pennisi 2005), with  
49 few generally accepted causal mechanisms and models (e.g., Grace *et al.* 2014; Pärtel *et al.*  
50 2016; DeMalach *et al.* 2017). Moreover, we also lack cost-effective, validated methods for  
51 assessing biodiversity. Given the global biodiversity crisis, the need for establishing causes for  
52 spatial and temporal variation in biodiversity is acute (Hill *et al.* 2016; Ceballos *et al.* 2017).

53 Brunbjerg *et al.* (2017b) proposed *ecospace* as a unifying framework for assessing and  
54 managing variation in biodiversity within regional species pools. *Ecospace* represents the  
55 variation in local environment separated into abiotic position (in environmental hyperspace),  
56 biotic expansion (diversification of organic matter) and spatio-temporal continuity. Vascular  
57 plants are the dominant primary producers of terrestrial ecosystems and plants are quite accurate  
58 indicators of the abiotic environment, in which they grow. Here, we test whether plant  
59 community composition may be used to predict the overall biodiversity through bioindication of  
60 abiotic position and biotic expansion in *ecospace*.

61 The intractability of total species surveys, has motivated the use of surrogate species in  
62 conservation planning (Margules & Pressey 2000; Sarkar & Margules 2002), with the underlying  
63 assumption that species richness correlate among taxonomic groups (Gaston 1996). Surrogate  
64 species are assumed to reflect the distribution of other species or taxonomic groups, but also to  
65 indicate the occurrence of habitats and species of high conservation value (Pearman & Weber  
66 2007). Much research has focused on testing surrogacy and selecting the best taxa (reviewed in

67 Rodrigues & Brooks 2007). It has generally been found that correlations in species richness  
68 across taxa vary depending on spatial scale (grain and extent), geographic location (Hess *et al.*  
69 2006) and taxonomic focus (e.g., Wolters *et al.* 2006). Overall, biodiversity surrogacy studies  
70 have shown only weak predictive power (Su *et al.* 2004; Rodrigues & Brooks 2007). Similarity  
71 in community composition shows more convincing results than species richness. This may be  
72 because species composition exhibits a stronger relationship to environmental gradients than  
73 does species richness (Su *et al.* 2004; Prober *et al.* 2015). In general, using multi-taxon surrogacy  
74 to select areas of conservation interest has been proposed as a more robust measure of  
75 biodiversity than single-taxon surrogacy (Smith-Patten & Patten 2015). Environmental  
76 characteristics of an area or biotope, i.e. environmental surrogates, have also been tested, but  
77 found to be less useful for prediction than cross-taxon surrogates (Rodrigues & Brooks 2007).

78 Plants are very often included in biodiversity monitoring programs for several good reasons:  
79 Plants are sessile and reflect conditions at the place of observation, plants are less seasonal and  
80 their detection is less dependent on weather conditions than are fungi and arthropods, plants  
81 occur in most ecosystems, and skilled field botanists are generally available. Despite their wide  
82 use, the evidence for using plants as surrogates for multi-taxon biodiversity is equivocal  
83 (Sætersdal *et al.* 2004; Wolters *et al.* 2006; Myšák & Horsák 2014). Complex metrics  
84 representing habitat quality based on weighted measures of vegetation structure (e.g. native plant  
85 species richness, number of trees with hollows and total length of fallen logs), plant species  
86 richness and functional diversity, have also been suggested to work as surrogates for overall  
87 biodiversity, but with limited success (Kwok *et al.* 2011; Hanford *et al.* 2017). Despite the  
88 moderate support, plant-based monitoring programs and conservation guidelines remain a  
89 common practice, even at supranational levels. For example, in the EU Habitats Directive

90 (1992), plants are implicitly assumed to work as indicators for both habitat types (so-called  
91 Annex 1 habitats) and their conservation status. Moreover, averaging plant indicator values (e.g.,  
92 Ellenberg Indicator Values, Ellenberg *et al.* 1991) is commonly used in vegetation studies to  
93 assess local conditions (e.g., Diekmann 2003). The validity of plant-based bioindication has been  
94 confirmed by direct measurement of the environmental conditions and by plant growth  
95 experiments (e.g., Schaffers & Sýkora 2000; Bartelheimer & Poschlod 2016).

96 Our approach to bioindication follows the ecospace framework (Brunbjerg *et al.* 2017b).  
97 Since plants can be used as indicators of the abiotic environment, they can describe the ecospace  
98 *position*. With regard to ecospace *expansion*, i.e. the differentiation of organic matter, each  
99 different plant species constitute a potential substrate for specialized insects and fungi (Strong *et*  
100 *al.* 1984; Basset *et al.* 2012; Zhang *et al.* 2016; Brunbjerg *et al.* 2017b). While the species  
101 richness responses to ecospace position along environmental gradients may vary among  
102 taxonomic groups, we generally expect ecospace expansion by plant species richness to have a  
103 positive effect, at least on the richness of heterotrophic taxa.

104 Plants are highly responsive to land-use change, which usually involves replacement of  
105 natural vegetation by crops and weeds, a process generally considered a major cause of  
106 biodiversity loss (Pimm *et al.* 2014; Lehsten *et al.* 2015). Effects may be detectable in plant  
107 communities for decades or even longer (Gustavsson *et al.* 2007; Hermy & Verheyen 2007). We  
108 expect a plant-derived land-use intensity indicator to be useful for prediction of multitaxon  
109 species richness, especially when used in combination with a plant-derived indicator of abiotic  
110 conditions and plant species richness.

111 Here we put the value of a plant species list to a test. We use a comprehensive dataset of 130  
112 sites, each 40 × 40 m, sampled for richness of plants and a range of other taxa including DNA

113 derived OTUs (Operational Taxonomic Units), collectively spanning the major environmental  
114 variation in terrestrial habitats within a region (from wet to dry, nutrient rich to nutrient poor,  
115 early to late succession). These data allow us to investigate the following questions:

116 1) Can plant species richness be used as surrogate for species richness of other taxa across  
117 habitat types?

118 2) Does plant-inferred *ecospace*, in the form of a combination of plant species richness and  
119 environmental bioindication, improve the prediction of species richness of other taxa?

120 Our study is the first to comprehensively validate the ubiquitous use of plants in conservation  
121 planning and monitoring, which has been incorporated – based on anecdotal evidence and  
122 tradition – into national and supranational legislation.

## 123 **METHODS**

124 We selected 130 study sites (40 m × 40 m) evenly distributed across five geographic regions in  
125 Denmark (Fig. S1 in Supporting Information). Within each region, sites were placed in three  
126 clusters for logistical reasons, but with a minimum distance of 500 m between sites to reduce  
127 spatial covariance. Site selection was stratified according to primary environmental gradients.

128 We allocated 30 sites to cultivated habitats and 100 sites to natural habitats. The cultivated subset  
129 was stratified according to major land use type and the natural subset was selected amongst  
130 uncultivated habitats and stratified according to gradients in soil fertility, soil moisture and  
131 successional stage. We deliberately excluded saline and aquatic habitats, but included  
132 temporarily inundated depressions as well as mires and fens. The final set of 24 habitat strata  
133 consisted of the following six cultivated habitat types: Three types of fields (rotational, grass  
134 leys, set aside) and three types of plantations (beech, oak, spruce). The remaining 18 strata were  
135 natural habitats, constituting all factorial combinations of: Fertile and infertile; dry, moist and

136 wet; open, tall herb/scrub and forest. These 24 strata were replicated in each of the five  
137 geographical regions. We further included a subset of 10 perceived hotspots for biodiversity in  
138 Denmark, selected subjectively by public voting among active naturalists in the Danish  
139 conservation and management societies, but restricted so that each region held two hotspots. See  
140 Brunbjerg *et al.* (2017a) for more details on site selection and stratification.

#### 141 **Collection of biodiversity data**

142 The field inventory aimed at an unbiased and representative assessment of the multi-taxon  
143 species richness in each of the 130 sites. We collected data on vascular plants, bryophytes,  
144 lichens, macrofungi, arthropods and gastropods. Due to the limited size of each site, we excluded  
145 vertebrates from consideration. We conducted a complete inventory of vascular plants and  
146 bryophytes. For the remaining taxa, which are more demanding to find, catch, and identify, we  
147 aimed at collecting a reproducible and un-biased sample through a standardized effort. Each site  
148 was carefully examined for gastropods, lichens, plant-galling arthropods (a single visit per  
149 group) and macrofungi (three visits at different times within the autumn season), actively  
150 searching contrasted microhabitats and substrates (soil, herbaceous vegetation and debris, wood,  
151 stone surfaces and bark of trees up to 2 m). Similarly, a standard set of passive traps was used to  
152 survey insects (pitfall traps, meat-baited and dung-baited traps, yellow pan traps and Malaise  
153 traps) during periods of standard length and timing. Biodiversity survey methods are detailed in  
154 (Brunbjerg *et al.* 2017a).

#### 155 **OTU richness from DNA metabarcoding**

156 Massive parallel sequencing of amplified marker genes from environmental DNA from e.g., a  
157 soil sample – also known as DNA metabarcoding – is increasingly used to assess biological  
158 communities (Taberlet *et al.* 2012). Sequences are traditionally grouped into ecologically



159 meaningful Operational Taxonomic Units (OTUs), which are then used as richness estimates  
160 (Bálint *et al.* 2016; Frøslev *et al.* 2017). In order to extend our biodiversity assessment to  
161 organisms assumed to be poorly represented in traditional surveys, we included OTU richness of  
162 fungi and general eukaryotes from soil samples and of arthropods from Malaise traps (called  
163 fungal OTUs, eukaryote OTUs and Malaise OTUs, respectively). Taxa preferentially caught in  
164 Malaise traps (mostly Diptera and Hymenoptera) remain largely unidentified, but Malaise OTUs  
165 may have a minor overlap with respect to the hoverfly and spider specimens caught in these traps  
166 as these were pooled with contents of the other traps in richness estimates for these two groups.

167 We collected soil from all sites and subjected it to metabarcoding through DNA extraction,  
168 PCR amplification of genetic marker regions (DNA barcoding regions) and massive parallel  
169 sequencing on the Illumina platform as described in (Brunbjerg *et al.* 2017a). The soil sampling  
170 scheme included the mixing of 81 soil cores from each site in an attempt to get a representative  
171 sample. For this study, we used sequencing data from genes amplified with primers targeting  
172 fungi and eukaryotes. For eukaryotes, we used the primers 18S\_allshorts (Guardiola *et al.* 2015,  
173 2016) with a slight modification of the forward primer (TTTGTCTGGTTAATTCCG) to exclude  
174 fungi. For fungi, we amplified the ITS2 region with primers gITS7 (Ihrmark *et al.* 2012) and  
175 ITS4 (White *et al.* 1990). Furthermore, we extracted DNA from the ethanol of Malaise traps and  
176 subjected it to sequencing. For this we amplified a region of the CO1 gene of primarily  
177 arthropods with primers ZBJ-ArtF1c and ZBJ-ArtR2c (Zeale *et al.* 2011), and subjected it to a  
178 sequencing approach similar to the other markers. We extracted, amplified, and sequenced DNA  
179 from two independent trapping periods for each site and combined these to obtain a single  
180 richness measure.

181 The bioinformatic processing of the sequence data followed the strategy outlined in  
182 (Brunbjerg *et al.* 2017a) including post-clustering curation with the LULU algorithm (Frøslev *et*  
183 *al.* 2017) in order to obtain reliable alpha diversity estimates for OTU data. Although, it is  
184 widely acknowledged (e.g., Bálint *et al.* 2016) that species richness is difficult to estimate from  
185 sequencing data of environmental DNA, Frøslev *et al.* (2017) showed that careful bioinformatics  
186 processing can produce richness measures based on OTU data with strong correlation to richness  
187 metrics based on survey data. For this study, a simple OTU count was used as a DNA based  
188 richness metric, after ensuring that variation in sequencing depth between samples only had a  
189 minor impact (results not shown).

### 190 **Conservation Index**

191 A metric of conservation value was produced to test if plants can predict the richness of species  
192 of conservation concern. For vascular plants, macrofungi, lichens, gastropods, spiders and  
193 arthropods we used the national red list for Denmark (Wind & Pihl 2004). For taxonomic groups  
194 lacking a national red list (bryophytes and galling arthropods) an expert-based red listing was  
195 created for this project using the same criteria as the official red lists (bryophyte expert: Irina  
196 Goldberg, galling arthropod expert: Hans Henrik Bruun). Each red listed species contributed to a  
197 weighted score of threatened species per site (the Conservation Index) as follows: red list status  
198 RE (regionally extinct) and CR (critically endangered) = 4 points, red list status EN (moderately  
199 endangered) = 3 points, red list status VU (vulnerable) = 2 points, and red list status NT (near  
200 threatened) and DD (data deficient) = 1 point.

### 201 **Abiotic Factors and Environmental Calibration**

202 We used field-measured abiotic variables to validate the plant-based environmental calibration.  
203 Environmental recordings and estimates included soil pH, soil C, N and P, soil moisture, leaf N

204 and P concentrations, air temperature, light intensity, soil surface temperature, and humidity,  
205 number of trees >40dbh, dead wood volume, and vapor pressure deficit (VPD). For further  
206 details on methods for collection of the abiotic data see (Brunbjerg *et al.* 2017a).  
207 Mean Ellenberg Indicator Values were calculated for light conditions, soil nutrient status, soil pH  
208 and soil moisture based on the plant lists for each site and the species' abiotic optima (Ellenberg  
209 *et al.* 1991).

## 210 **Natural Habitat Index**

211 To supplement the plant-based environmental calibration, we calculated a plant-based natural  
212 habitat index reflecting land use intensity using 115,071 vegetation quadrats from the national  
213 monitoring of terrestrial biodiversity (Svendsen *et al.* 2005; Nielsen *et al.* 2012). Vegetation data  
214 were grouped in quadrats from Annex 1 habitats (A1) (EU Habitats Directive 1992) of  
215 conservation value (excluding nitrophilous tall herb fringes), other quadrats sampled in natural  
216 areas (Na), and quadrats sampled in agricultural (Ag) landscapes (road verges, hedges, soil banks  
217 *etc.*). For each species in the dataset a natural habitat score was calculated as:

$$\frac{f(A1) + 0.5 * f(Na)}{f(A1) + f(Na) + f(Ag)}$$

218 Where  $f()$  = frequency of species in the mentioned habitat category.

219 The species level score is thus a number between 0 and 1, where 0 implies that the species  
220 only occurs in agricultural biotopes and 1 implies that the species only occurs in habitats of  
221 conservation concern. The natural habitat index was calculated for each site as the mean of  
222 species scores. It reflects land use and land use history under the assumption that protected  
223 natural areas have been less intensively managed than farmland habitats.

## 224 **Analyses**

225 We used Spearman rank correlation to test for correlations between species richness of vascular  
226 plants and the richness of other taxonomic groups including macrofungi, lichens, bryophytes,  
227 gastropods, plant galling arthropods, carabid beetles, hoverflies, spiders, fungal OTUs, eukaryote  
228 OTUs and Malaise OTUs. To validate the plant-based environmental calibration, Spearman  
229 correlations were calculated between Ellenberg Indicator Values, the natural habitat index, and  
230 measured environmental variables (soil moisture, soil C, N, and P, leaf N, and P, soil pH,  
231 surface, and air temperature, light intensity, number of trees >40dbh, dead wood volume, and  
232 vapor pressure deficit (VPD)).

233 We also grouped the 130 study sites into five different land use intensity categories from  
234 protected Annex 1 habitats, over other uncultivated areas, plantation forest and extensively  
235 farmed habitats to intensive farmland. ANOVA followed by Tukey's post hoc tests was used to  
236 test for differences in mean natural habitat index value between the five habitat types.

237 To assess the efficiency of plants as indicators for other taxonomic groups, we performed  
238 multiple regression with species richness of macrofungi, bryophytes, lichens, plant galling  
239 arthropods, gastropods, carabid beetles, hoverflies, spiders, the Conservation Index, soil fungal  
240 and eukaryote OTU richness and Malaise OTU richness as response variables and plant species  
241 richness and plant-derived bioindicators as explanatory variables. Data exploration was carried  
242 out following the protocol described in Zuur *et al.* (2010). Collinearity was assessed using  
243 Variance Inflation Factors (VIF) sequentially disregarding variables showing VIF values >3  
244 from the VIF calculations (Zuur *et al.* 2010). Ellenberg nutrient status was found to be correlated  
245 with Ellenberg pH and our Conservation Index [VIF >3] and was excluded from all models. If  
246 GAM smoothers fitted to the residuals of the models were conservatively significant ( $p < 0.01$ )  
247 for any of the predictors, we included polynomials in the final model. To account for the

248 geographically nested design, we used Generalized Linear Mixed Modelling (GLMM) with a  
249 Poisson distribution and a log link function and with cluster (n=15) as random intercept. If  
250 overdispersion was detected, we used GLMM with Negative Binomial error distribution instead  
251 of Poisson error distribution (Hilbe 2011), given that the Deviance Information Criterion (DIC)  
252 indicated a better fit based on a  $\Delta DIC < 2$ , criterion. Model assumptions were verified by  
253 plotting residuals versus fitted values and versus each covariate in the model. We assessed the  
254 residuals for spatial dependency. Modelling was performed in R version 3.4.3 (R Core Team  
255 2017), models were fitted by approximate Bayesian inference using the INLA package (Rue *et*  
256 *al.* 2009). Explanatory variables were scaled prior to model implementation. Marginal posterior  
257 distributions were summarized by 95 % Bayesian credible intervals corresponding to the 0.025  
258 and 0.975 quantiles of the posterior distribution (Zuur *et al.* 2017). We chose not to perform  
259 model selection, but covariates can be considered statistically important if the 95% Bayesian  
260 credible intervals (BCI) do not overlap zero (Zuur *et al.* 2017). As an aid in the interpretation and  
261 comparison of model-based predictions, we calculated Pearson's product moment correlations  
262 between fitted values (only for fixed variables) and observed species richness of the response  
263 variables (pseudo  $R^2$ ).

## 264 **RESULTS**

### 265 **Biodiversity data**

266 The total number of species of plants, macrofungi, bryophytes, lichens, plant galling arthropods,  
267 gastropods, carabid beetles, hoverflies and spiders per site ranged from 78 to 481. Species  
268 number per site ranged from 11-134 for plants (with up to 5 red-listed plant species per site), 0-  
269 24 for gallers (up to 3 expert-assessed red-listed gallers per site), 0-180 for macrofungi (up to 15  
270 red listed macrofungi species per site), 0-33 for lichens (up to 12 red-listed lichen species per

271 site), 0-50 for bryophytes (up to 3 expert-assessed red-listed bryophyte species per site), 7-53 for  
272 spiders (up to 8 red-listed spider species per site), 0-21 for carabid beetles (up to 4 red-listed  
273 carabids per site), and 0-21 for hoverflies (up to 2 red-listed hoverflies per site). After  
274 bioinformatic processing the soil fungal OTU dataset resulted in an OTU richness per site  
275 ranging from 66 to 476. The soil eukaryote OTU data had a richness per site ranging from 206 to  
276 1549. The Malaise OTU dataset had a richness per site ranging from 25 to 160.

### 277 **Plant-derived environmental bioindication**

278 Plant-derived environmental bioindication was supported by correlation to independent data.  
279 Community mean Ellenberg Indicator Values correlated well with corresponding measured  
280 abiotic factors (Table S1 in Supporting Information). The natural habitat index scored highest for  
281 EU Habitats Directive Annex 1 habitats, intermediate for other uncultivated habitats, plantation  
282 forests and extensively farmed sites, and lowest for sites with intensive cropping (Fig. S2). The  
283 natural habitat index correlated negatively with Ellenberg nutrient status, indicating that plants  
284 with affinity to natural habitats generally occur in infertile environments (Fig. S3). Plant species  
285 richness correlated positively with plant-derived Ellenberg soil pH and soil nutrient status and  
286 with measured soil pH, C, N, and P. In contrast, there was a negative correlation between plant  
287 species richness and the number of trees > 40dbh, dead wood volume, and canopy height (Table  
288 S1).

### 289 **Plant species richness as surrogate for other taxonomic groups**

290 Spearman rank correlation between plant richness and species richness for other taxa revealed  
291 no significant correlation for macrofungi, bryophytes, lichens, carabid beetles and summed  
292 richness. The richness of plant-galling arthropods, gastropods, spiders and hoverflies showed  
293 significant positive relationships with plant richness (Table S2).

294 **Plant-derived bioindication of species richness**

295 Plant species richness was important for the prediction of species richness of all surveyed  
296 taxonomic groups except carabid beetles (Table 1, Fig. 1). Plant species richness was also  
297 important for richness of fungal OTUs, Malaise OTUs and for the Conservation Index (Table 1,  
298 Fig. 1). In all cases, except carabid beetles, the relationship between plant species richness and  
299 other groups was positive (Fig. 1).

300 Multiple regression of species richness of the selected taxa varied in percent explained  
301 variation by fixed variables from 12 % for carabid beetle richness to 55 % for gastropod species  
302 richness (Fig. 2). The corresponding bivariate regression between plant richness and other  
303 richness metrics explained below 5 % of variation in total richness for gastropods, total richness,  
304 bryophytes, fungi and eukaryote OTU richness, 5-10% explained variation for hoverflies, spiders  
305 and Conservation Index and 10-16% for fungal OTU richness, malaise OUT richness and galling  
306 insects (Fig 2).

307 Ellenberg light was generally important with positive effects for flying insects such as  
308 hoverflies and Malaise OTU richness and otherwise negative or neutral effects on species  
309 richness and Conservation Index. Increasing Ellenberg moisture seemed to promote the richness  
310 of spiders, bryophytes, macrofungi, gastropods, lichens, hoverflies and eukaryote OTU richness,  
311 whereas the effect on fungal OTU richness was weak and negative. Ellenberg pH had negative  
312 effects on spiders, bryophytes, hoverflies, and total richness, and positive effects on gastropods  
313 and eukaryote OTU richness. The natural habitat index had a positive effect on bryophyte and  
314 lichen species richness and the Conservation Index, a negative effect on hoverflies, carabids and  
315 spiders and a unimodal effect on macrofungi species richness (Table 1, Fig. S4).

316 **DISCUSSION**

317 Terrestrial biodiversity of heterotrophic organisms relies on the build-up and diversification of  
318 organic matter produced by plants. Therefore, it may seem reasonable to use the species richness  
319 of vascular plants as a proxy of total biodiversity in science and in conservation planning and  
320 management. However, neither plants nor other single taxa have hitherto been confirmed as  
321 reliable surrogates for other taxa. This point was supported by our simple cross-taxon  
322 correlations. Although plant species richness did correlate positively with four out of eight  
323 surveyed taxonomic groups, the correlations were generally weak and the overall performance of  
324 vascular plants as biodiversity surrogate was poor. A multivariate modelling approach, with  
325 simultaneous inclusion of plant-derived bioindication and plant species richness, showed a much  
326 stronger - and consistently positive - effect of plant species richness on the species richness of  
327 other taxa, as well as on the Conservation Index and OTU richness measures, except soil  
328 eukaryote OTU richness and carabid species richness (Fig. 1).

329 In monitoring programs, plants are often used as general indicators of conservation status of  
330 habitats without explicit testing. While plant species richness in itself may be a poor indicator for  
331 the richness of other species groups, plant indication may be a cost-effective approach to  
332 estimate environmental conditions (e.g., Diekmann 2003) and possibly also the habitat quality  
333 (Andersen *et al.* 2013). We used Ellenberg Indicator Values for light conditions, soil moisture,  
334 nutrient conditions and soil pH (Ellenberg *et al.* 1991), which are available only for the Central  
335 European flora. Our approach may still be applicable in other parts of the world because species  
336 scores from ordination of large and representative vegetation datasets typically reflect major  
337 environmental gradients (e.g., Ejrnæs *et al.* 2002) and may replace Ellenberg Indicator Values in  
338 much the same way. While bioindication of environmental conditions is well developed, there is  
339 currently no standard approach to estimation of habitat quality by plant lists, despite the



340 scientific evidence that plants reflect land-use intensity and land-use history (Hermy & Verheyen  
341 2007). Plant based habitat quality scores may be obtained e.g. by expert judgment (Kowarik  
342 1990) or by empirical evidence (Ejrnæs *et al.* 2002; Ejrnæs *et al.* 2008). In this study, we  
343 calculated a naturalness index reflecting the affinity of plants with protected habitats and found  
344 that the index correlated closely with Ellenberg nutrient status.

345 Since an estimated > 85 % of the World's terrestrial species remain undescribed (Mora *et al.*  
346 2011), choosing surrogates that actually work and reflect general biodiversity is highly relevant.  
347 An obvious challenge is that different taxonomic or functional groups respond differently to  
348 habitat conditions. For example, lichens and bryophytes growing under extremely infertile  
349 conditions, often directly on stone and trees, will show a markedly different richness optimum  
350 along a fertility gradient than more competitive vascular plants. Likewise, generalist predatory  
351 beetles and spiders may be expected to respond differently than specialist herbivores such as gall  
352 wasps or aphids. Therefore, finding that plant species richness, after accounting for the abiotic  
353 environment, had a positive effect on species richness of all other taxa except carabids, lends  
354 strong support for the idea of biodiversity surrogacy and for vascular plants as optimal  
355 surrogates.

356 The taxonomic groups used in this study varied strongly in their ecological dependence on  
357 plants. Plant galling arthropods depend directly on specific plant species as hosts and represent a  
358 megadiverse group of phytophagous insects and mites with pronounced host specificity (Jaenike  
359 1990). Hoverflies are generally less host dependent as larvae, but utilize plants as sources of  
360 pollen and nectar in the adult life stage. On the other hand, we would expect generalist  
361 herbivores or predators such as gastropods, carabid beetles and spiders, as well as primary  
362 producers such as lichens and bryophytes, to be causally unrelated to specific plant species. Still,

363 such species may respond to environmental conditions also influencing plant species richness.  
364 Macrofungi constitute several functional groups including both generalist decomposers and  
365 mycorrhizal symbionts, some of which are specialized on a single plant genus or species. Many  
366 decomposer fungi are also specific to certain plant genera or species, while some are  
367 necrophagous and highly specialized on arthropods or other fungi. Despite the difference in plant  
368 species specificity, the positive effect of plant species richness was consistent across taxonomic  
369 groups, pointing to a general applicability of plants as surrogates, even for predatory and  
370 decomposer organisms. Plant richness and environmental calibration obtained through  
371 bioindication together could account for 48% of the variation in richness of all other surveyed  
372 taxa combined. The figures for predicted OTU richness were also supportive with 24-30 % of  
373 variation explained.

374 The amount of explained variation was lowest for species richness of carabid beetles (12%),  
375 lichens (18%) and spiders (24%), possibly indicating that vegetation structure or microclimatic  
376 properties unrelated to plant community composition may be more important to species in these  
377 groups. Mobile generalist predators such as spiders and carabid beetles may rely less on site  
378 conditions than sessile species such as plants and fungi. A large proportion of lichens are  
379 epilithic or epiphytic on boulders and trees, and therefore partly uncoupled from the prevailing  
380 environmental site conditions as reflected by vascular plants. Despite the general usefulness of  
381 plants as surrogates, the amount of unexplained variation for specific groups such as lichens,  
382 carabids and hoverflies demonstrate that surrogates and indicators should be selected with due  
383 reference to spatial scale and the ecology of the target species groups (Zurlini & Girardin 2008;  
384 Kwok *et al.* 2011).

385 In order to test the generality of vascular plants as surrogates, we also included three richness  
386 metrics derived from DNA metabarcoding – soil fungal and soil eukaryote OTUs from eDNA  
387 and aerial arthropod OTUs from Malaise trap DNA. Despite a thorough sample of 81 regularly  
388 spaced soil cores, we have merely covered an approximate 0.01 % of the soil surface of the study  
389 sites. This could pose a bottleneck for getting a representative sample of OTUs in diverse and  
390 heterogeneous habitats. We assume that the eukaryotic and the fungal genetic markers are  
391 targeting a soil community depending on micro-climate and soil composition, and less on  
392 vegetation – at least compared to the organisms recorded above ground. Furthermore, the  
393 inherent problems in getting reliable richness estimates from eDNA sequencing are widely  
394 acknowledged (e.g., Bálint *et al.* 2016). We find it encouraging that the general pattern of a  
395 positive effect of plant species richness was reproduced for OTU-richness, albeit insignificant for  
396 eukaryotes, and that the explained variance by multiple regressions with plant-derived  
397 environmental variables approached 25 % for three taxonomically very different OTU taxa.

398 Rare and threatened species are particularly important to conservation, and we demonstrated  
399 that a plant-based model could explain 23% of the variation in our Conservation Index based on  
400 occurrence of red-listed species. Our sites were only 40 m × 40 m and, thus, too small for a  
401 representative sampling of very rare species. With larger plots we would expect a higher  
402 proportion of explained variation. A general index of site uniqueness could replace the use of  
403 rare species for assessment of conservation value of such small sites. Our natural habitat index  
404 was the strongest predictor of variation in the Conservation Index which is in accordance with  
405 evidence for the preferences of threatened species for rare natural habitats (Pearman & Weber  
406 2007 and references therein).

407 We find it encouraging that the richness of vascular plants is a consistent positive predictor of  
408 multiple functional groups comprised by our multi-taxon species richness estimate. However,  
409 looking at the direct trophic effects, we see opportunities for further improvement of plant  
410 surrogacy. It has long been acknowledged that plants serve as mutualistic partners for other  
411 organisms (e.g., Elton 1949). With respect to the diversification of organic matter, Southwood  
412 (1961) and later work by Brändle and Brandl (2001) quantified the richness of phytophagous  
413 insects on European trees and showed that the size of their associated biotas vary enormously  
414 and predictably, i.e., large, long-lived and omnipresent species may harbor a more diverse pool  
415 of insects than small annuals or uncommon species. A thorough examination of reported  
416 interactions between plants and associated invertebrates and fungi may be used to create a more  
417 powerful surrogate for total biodiversity than the mere number of plant species.

418 Vascular plants play an important role in the conservation prioritization and monitoring. In  
419 this study, we demonstrate that plant species are useful surrogates for biodiversity at large, but  
420 only when environmental bioindication is taken into account. Our results support the *ecospace*  
421 framework for biodiversity, implying that future research into the diversification of organic  
422 matter may further improve the value of plant-related indicators as surrogates of biodiversity in  
423 general.

#### 424 **ACKNOWLEDGEMENTS**

425 RE, LB, IG, TL, TGF, CF and AKB were supported by a grant from VILLUM foundation  
426 (Biowide, VKR-023343). We thank Aimee Classen and Greg Newman for assistance with the  
427 analysis of soil properties, Vagn Alstrup (†), Ulrik Søchting and Roar Skovlund Poulsen for  
428 lichen surveying, Karl-Henrik Larsson for aid in identifying critical corticioid fungi, Leif  
429 Örstadius for identifying *Psathyrella* collections. We thank Lars Dyhrberg Bruun for identifying

430 spiders, Monica Oyre for identifying hover flies, and Oskar Liset Pryds Hansen, and Emil  
431 Skovgaard Brandtoft for identifying carabid beetles. We also thank a large group of volunteers  
432 for assistance during species surveys.

#### 433 **REFERENCES**

434 1.

435 Andersen, D.K., Nygaard, B., Fredshavn, J.R. & Ejrnæs, R. (2013). Cost-effective assessment of  
436 conservation status of fens. *Appl. Veg. Sci.*, 16, 491-501.

437 2.

438 Bálint, M., Bahram, M., Eren, A.M., Faust, K., Fuhrman, J.A., Lindahl, B. *et al.* (2016). Millions  
439 of reads, thousands of taxa: microbial community structure and associations analyzed via marker  
440 genes. *FEMS Microbiol. Rev.*, 40, 686-700.

441 3.

442 Bartelheimer, M. & Poschlod, P. (2016). Functional characterizations of Ellenberg indicator  
443 values—a review on ecophysiological determinants. *Funct. Ecol.*, 30, 506-516.

444 4.

445 Basset, Y., Cizek, L., Cuénoud, P., Didham, R.K., Guilhaumon, F., Missa, O. *et al.* (2012).  
446 Arthropod diversity in a tropical forest. *Science*, 338, 1481-1484.

447 5.

448 Brunbjerg, A.K., Bruun, H.H., Brøndum, L., Classen, A.T., Fog, K., Frøslev, T.G. *et al.* (2017a).  
449 A systematic survey of regional multitaxon biodiversity: evaluating strategies and coverage.  
450 *bioRxiv*, 158030.

451 6.

- 452 Brunbjerg, A.K., Bruun, H.H., Moeslund, J.E., Sadler, J.P., Svenning, J.-C. & Ejrnæs, R.  
453 (2017b). Ecospace: A unified framework for understanding variation in terrestrial biodiversity.  
454 *Basic Appl. Ecol.*, 18, 86-94.  
455 7.
- 456 Brändle, M. & Brandl, R. (2001). Species richness of insects and mites on trees: expanding  
457 Southwood. *J. Anim. Ecol.*, 70, 491-504.  
458 8.
- 459 Ceballos, G., Ehrlich, P.R. & Dirzo, R. (2017). Biological annihilation via the ongoing sixth  
460 mass extinction signaled by vertebrate population losses and declines. *PNAS*, 114, E6089-E6096.  
461 9.
- 462 DeMalach, N., Zaady, E. & Kadmon, R. (2017). Light asymmetry explains the effect of nutrient  
463 enrichment on grassland diversity. *Ecol. Lett.*, 20, 60-69.  
464 10.
- 465 Diekmann, M. (2003). Species indicator values as an important tool in applied plant ecology—a  
466 review. *Basic Appl. Ecol.*, 4, 493-506.  
467 11.
- 468 Ejrnæs, R., Aude, E., Nygaard, B. & Münier, B. (2002). Prediction of habitat quality using  
469 ordination and neural networks. *Ecol. Appl.*, 12, 1180-1187.  
470 12.
- 471 Ejrnæs, R., Liira, J., Poulsen, R.S. & Nygaard, B. (2008). When has an abandoned field become  
472 a semi-natural grassland or heathland? *Environ. Manage.*, 42, 707-716.  
473 13.

474 Ellenberg, H., Weber, H.E., Düll, R., Wirth, V., Werner, W. & Paulißen, D. (1991). Zeigerwerte  
475 von pflanzen in Mitteleuropa. *Scripta Geobotanica*, 18, 1-248.  
476 14.

477 Elton, C. (1949). Population interspersion: an essay on animal community patterns. *J. Ecol.*, 1-  
478 23.  
479 15.

480 EU Habitats Directive (1992). Council Directive 92/43/EEC of 21 May 1992 on the conservation  
481 of natural habitats and of wild fauna and flora. *Official Journal of the European Union*, 206, 7-  
482 50.  
483 16.

484 Frøslev, T.G., Kjølner, R., Bruun, H.H., Ejrnæs, R., Brunbjerg, A.K., Pietroni, C. *et al.* (2017).  
485 Algorithm for post-clustering curation of DNA amplicon data yields reliable biodiversity  
486 estimates. *Nat. Commun.*, 8, 1188.  
487 17.

488 Gaston, K.J. (1996). Biodiversity-congruence. *Prog. Phys. Geo.*, 20, 105-112.  
489 18.

490 Grace, J.B., Adler, P.B., Stanley Harpole, W., Borer, E.T. & Seabloom, E.W. (2014). Causal  
491 networks clarify productivity–richness interrelations, bivariate plots do not. *Funct. Ecol.*, 28,  
492 787-798.  
493 19.

494 Guardiola, M., Uriz, M.J., Taberlet, P., Coissac, E., Wangenstein, O.S. & Turon, X. (2015).  
495 Deep-sea, deep-sequencing: metabarcoding extracellular DNA from sediments of marine  
496 canyons. *PLOS ONE*, 10, e0139633.

- 497 20.
- 498 Guardiola, M., Uriz, M.J., Taberlet, P., Coissac, E., Wangenstein, O.S. & Turon, X. (2016).
- 499 Correction: Deep-sea, deep-sequencing: metabarcoding extracellular DNA from sediments of
- 500 marine canyons. *PLOS ONE*, 11, e0153836.
- 501 21.
- 502 Gustavsson, E., Lennartsson, T. & Emanuelsson, M. (2007). Land use more than 200 years ago
- 503 explains current grassland plant diversity in a Swedish agricultural landscape. *Biol. Conserv.*,
- 504 138, 47-59.
- 505 22.
- 506 Hanford, J.K., Crowther, M.S. & Hochuli, D.F. (2017). Effectiveness of vegetation-based
- 507 biodiversity offset metrics as surrogates for ants. *Conserv. Biol.*, 31, 161-171.
- 508 23.
- 509 Hermy, M. & Verheyen, K. (2007). Legacies of the past in the present-day forest biodiversity: a
- 510 review of past land-use effects on forest plant species composition and diversity. *Ecol. Res.*, 22,
- 511 361-371.
- 512 24.
- 513 Hess, G.R., Bartel, R.A., Leidner, A.K., Rosenfeld, K.M., Rubino, M.J., Snider, S.B. *et al.*
- 514 (2006). Effectiveness of biodiversity indicators varies with extent, grain, and region. *Biol.*
- 515 *Conserv.*, 132, 448-457.
- 516 25.
- 517 Hilbe, J.M. (2011). *Negative binomial regression*. 2nd edn. Cambridge University Press,
- 518 Cambridge, UK.
- 519 26.



- 520 Hill, S.L., Harfoot, M., Purvis, A., Purves, D.W., Collen, B., Newbold, T. *et al.* (2016).  
521 Reconciling biodiversity indicators to guide understanding and action. *Conserv. Lett.*, 9, 405-  
522 412.  
523 27.
- 524 Ihrmark, K., Bödeker, I.T., Cruz-Martinez, K., Friberg, H., Kubartova, A., Schenck, J. *et al.*  
525 (2012). New primers to amplify the fungal ITS2 region—evaluation by 454-sequencing of  
526 artificial and natural communities. *FEMS Microbiol. Ecol.*, 82, 666-677.  
527 28.
- 528 Jaenike, J. (1990). Host specialization in phytophagous insects. *Annu. Rev. Ecol. Syst.*, 21, 243-  
529 273.  
530 29.
- 531 Kowarik, I. (1990). Some response of flora and vegetation to urbanization in central Europe. In:  
532 *Urban Ecology: plants and plant communities in urban environments* (eds. Sukopp, H, Hejný, S  
533 & Kowarik, D). SPB Academic Publishing Amsterdam, The Netherlands, pp. 45-74.  
534 30.
- 535 Kwok, A.B., Eldridge, D.J. & Oliver, I. (2011). Do landscape health indices reflect arthropod  
536 biodiversity status in the eucalypt woodlands of eastern Australia? *Austral Ecol.*, 36, 800-813.  
537 31.
- 538 Lehsten, V., Sykes, M.T., Scott, A.V., Tzanopoulos, J., Kallimanis, A., Mazaris, A. *et al.* (2015).  
539 Disentangling the effects of land-use change, climate and CO<sub>2</sub> on projected future European  
540 habitat types. *Global Ecol. Biogeogr.*, 24, 653-663.  
541 32.
- 542 Margules, C.R. & Pressey, R.L. (2000). Systematic conservation planning. *Nature*, 405, 243-253.

543 33.

544 Mora, C., Tittensor, D.P., Adl, S., Simpson, A.G. & Worm, B. (2011). How many species are  
545 there on Earth and in the ocean? *PLoS Biol.*, 9, e1001127.

546 34.

547 Myšák, J. & Horsák, M. (2014). Biodiversity surrogate effectiveness in two habitat types of  
548 contrasting gradient complexity. *Biodivers. Conserv.*, 23, 1133-1156.

549 35.

550 Nielsen, K.E., Bak, J.L., Bruus Pedersen, M., Damgaard, C., Ejrnæs, R., Fredshavn, J.R. *et al.*  
551 (2012). NATURDATA. DK–Danish monitoring program of vegetation and chemical plant and  
552 soil data from non-forested terrestrial habitat types. *Biodiversity & Ecology*, 4, 375.

553 36.

554 Pearman, P.B. & Weber, D. (2007). Common species determine richness patterns in biodiversity  
555 indicator taxa. *Biol. Conserv.*, 138, 109-119.

556 37.

557 Pennisi, E. (2005). What determines species diversity? *Science*, 309, 90.

558 38.

559 Pimm, S.L., Jenkins, C.N., Abell, R., Brooks, T.M., Gittleman, J.L., Joppa, L.N. *et al.* (2014).  
560 The biodiversity of species and their rates of extinction, distribution, and protection. *Science*,  
561 344, 1246752.

562 39.

563 Prober, S.M., Leff, J.W., Bates, S.T., Borer, E.T., Firn, J., Harpole, W.S. *et al.* (2015). Plant  
564 diversity predicts beta but not alpha diversity of soil microbes across grasslands worldwide.  
565 *Ecol. Lett.*, 18, 85-95.

566 40.

567 Pärtel, M., Bennett, J.A. & Zobel, M. (2016). Macroecology of biodiversity: disentangling local  
568 and regional effects. *New Phytol.*, 211, 404-410.

569 41.

570 R Core Team (2017). R: A language and environment for statistical computing. R Foundation for  
571 Statistical Computing Vienna, Austria.

572 42.

573 Rodrigues, A.S. & Brooks, T.M. (2007). Shortcuts for biodiversity conservation planning: the  
574 effectiveness of surrogates. *Annu. Rev. Ecol. Evol. Syst.*, 38, 713-737.

575 43.

576 Rue, H., Martino, S. & Chopin, N. (2009). Approximate Bayesian inference for latent Gaussian  
577 models by using integrated nested Laplace approximations. *J. Roy. Stat. Soc. Ser. B. (Stat.  
578 Method.)*, 71, 319-392.

579 44.

580 Sarkar, S. & Margules, C. (2002). Operationalizing biodiversity for conservation planning. *J.  
581 Biosci. (Bangalore)*, 27, 299-308.

582 45.

583 Schaffers, A.P. & Sýkora, K.V. (2000). Reliability of Ellenberg indicator values for moisture,  
584 nitrogen and soil reaction: a comparison with field measurements. *J. Veg. Sci.*, 11, 225-244.

585 46.

586 Smith-Patten, B.D. & Patten, M.A. (2015). Beyond surrogacy - a multi-taxon approach to  
587 conservation biogeography. *Biotropica*, 47, 128-135.

588 47.

589 Southwood, T. (1961). The number of species of insect associated with various trees. *J. Anim.*  
590 *Ecol.*, 30, 1-8.  
591 48.

592 Strong, D.R., Lawton, J.H. & Southwood, S.R. (1984). *Insects on plants. Community patterns*  
593 *and mechanisms*. Blackwell Scientific Publications by Harvard University Press, Cambridge,  
594 Massachusetts, USA.  
595 49.

596 Su, J.C., Debinski, D.M., Jakubauskas, M.E. & Kindscher, K. (2004). Beyond species richness:  
597 Community similarity as a measure of cross-taxon congruence for coarse-filter conservation.  
598 *Conserv. Biol.*, 18, 167-173.  
599 50.

600 Svendsen, L., Bijl, L.v.d., Boutrup, S. & Norup, B. (2005). NOVANA. National monitoring and  
601 assessment programme for the aquatic and terrestrial environments: Programme description -  
602 part 2. National Environmental Research Institute.  
603 51.

604 Sætersdal, M., Gjerde, I., Blom, H.H., Ihlen, P.G., Myrseth, E.W., Pommeresche, R. *et al.*  
605 (2004). Vascular plants as a surrogate species group in complementary site selection for  
606 bryophytes, macrolichens, spiders, carabids, staphylinids, snails, and wood living polypore fungi  
607 in a northern forest. *Biol. Conserv.*, 115, 21-31.  
608 52.

609 Taberlet, P., Coissac, E., Pompanon, F., Brochmann, C. & Willerslev, E. (2012). Towards next-  
610 generation biodiversity assessment using DNA metabarcoding. *Mol. Ecol.*, 21, 2045-2050.  
611 53.

612 White, T.J., Bruns, T., Lee, S. & Taylor, J. (1990). Amplification and direct sequencing of fungal  
613 ribosomal RNA genes for phylogenetics. *PCR protocols: a guide to methods and applications*,  
614 18, 315-322.  
615 54.

616 Wind, P. & Pihl, S. (2004). Den danske rødliste. *Danmarks Miljøundersøgelser, Aarhus*  
617 *Universitet*.  
618 55.

619 Wolters, V., Bengtsson, J. & Zaitsev, A.S. (2006). Relationship among the species richness of  
620 different taxa. *Ecology*, 87, 1886-1895.  
621 56.

622 Zeale, M.R., Butlin, R.K., Barker, G.L., Lees, D.C. & Jones, G. (2011). Taxon-specific PCR for  
623 DNA barcoding arthropod prey in bat faeces. *Mol. Ecol. Resour.*, 11, 236-244.  
624 57.

625 Zhang, K., Lin, S., Ji, Y., Yang, C., Wang, X., Yang, C. *et al.* (2016). Plant diversity accurately  
626 predicts insect diversity in two tropical landscapes. *Mol. Ecol.*, 25, 4407-4419.  
627 58.

628 Zurlini, G. & Girardin, P. (2008). Introduction to the special issue on “Ecological indicators at  
629 multiple scales”. *Ecol. Indicators*, 8, 781-782.  
630 59.

631 Zuur, A.F., Ieno, E.N. & Elphick, C.S. (2010). A protocol for data exploration to avoid common  
632 statistical problems. *Methods Ecol. Evol.*, 1, 3-14.  
633 60.

634 Zuur, A.F., Ieno, E.N. & Seveliev, A.A. (2017). *Beginner's guide to spatial, temporal and*  
635 *spatial-temporal ecological data analysis with R-INLA*. Highland Statistics Ltd, Newburgh,  
636 United Kingdom.  
637

638 **SUPPORTING INFORMATION**

639 Table S1 – Spearman rank correlations between plant species richness (plant\_rich) and plant-  
640 derived environmental bioindication (Ellenberg Indicator Values) and measured abiotic factors.

641 Table S2 – Spearman rank correlation between plant species richness (plant\_rich) and species  
642 richness of other taxonomic groups and OTU richness.

643 Figure S1 – Map of Denmark showing the location of the 130 sites grouped into 15 clusters  
644 within five regions.

645 Figure S2 – Boxplot of natural habitat index for sites of five different habitat types.

646 Figure S3 – Correlation between natural habitat index and Ellenberg nutrient status.

647 Figure S4 - Relationships between explanatory variables and species richness of various  
648 taxonomic groups, Conservation Index and OTU richness.

649 **TABLES**

650 **Table 1. Model results for the full GLMM models (Poisson or Negative Binomial).**

651 Model results show the effects of plant species richness (plant\_rich), Ellenberg light (E\_light),  
 652 Ellenberg pH (E\_pH), Ellenberg moisture (E\_moisture) and natural habitat index (nat\_index), on  
 653 species richness of various taxonomic groups (total, bryophytes, carabids, gallers, gastropods,  
 654 hoverflies, lichens, macrofungi, and spiders), Conservation Index, and OTU richness (eukaryote,  
 655 fungal, and Malaise). Intercept, parameter estimates (marginal posterior means), and 95%  
 656 Bayesian credible intervals (BCI, i.e. the 0.025 and 0.975 quantiles of the posterior distribution)  
 657 are given in parentheses. Parameter estimates with 95% BCI not overlapping zero are shown in  
 658 bold.

| Response       | Intercept                   | plant_rich                  | E_light                        | E_moisture                    | E_pH                           | nat_index                      | nat_index <sup>2</sup>         |
|----------------|-----------------------------|-----------------------------|--------------------------------|-------------------------------|--------------------------------|--------------------------------|--------------------------------|
| Total richness | <b>5.00</b><br>(4.95, 5.06) | <b>0.22</b><br>(0.15, 0.29) | <b>-0.33</b><br>(-0.39, -0.27) | <b>0.11</b><br>(0.06, 0.17)   | <b>-0.13</b><br>(-0.22, -0.05) | 0.04<br>(-0.04, 0.12)          | -                              |
| Bryophytes     | <b>2.78</b><br>(2.7, 2.86)  | <b>0.35</b><br>(0.24, 0.45) | <b>-0.38</b><br>(-0.48, -0.28) | <b>0.24</b><br>(0.16, 0.32)   | <b>-0.36</b><br>(-0.5, -0.23)  | <b>0.14</b><br>(0.02, 0.27)    | -                              |
| Carabids       | <b>2.05</b><br>(1.96, 2.13) | -0.03<br>(-0.14, 0.08)      | 0.02<br>(-0.07, 0.11)          | 0.02<br>(-0.07, 0.11)         | 0.06<br>(-0.08, 0.20)          | <b>-0.12</b><br>(-0.24, -0.01) | -                              |
| Gallers        | <b>1.74</b><br>(1.61, 1.87) | <b>0.55</b><br>(0.38, .73)  | <b>-0.53</b><br>(-0.69, -0.38) | 0.08<br>(-0.05, 0.21)         | -0.20<br>(-0.41, 0.01)         | 0.01<br>(-0.19, 0.22)          | -                              |
| Gastropods     | <b>1.70</b><br>(1.58, 1.81) | <b>0.29</b><br>(0.15, 0.43) | <b>-0.72</b><br>(-0.86, -0.6)  | <b>0.29</b><br>(0.17, 0.41)   | <b>0.29</b><br>(0.12, 0.47)    | -0.02<br>(-0.19, 0.16)         | -                              |
| Hoverflies     | <b>1.87</b><br>(1.75, 1.98) | <b>0.27</b><br>(0.13, 0.42) | <b>0.38</b><br>( 0.25, 0.52)   | <b>0.24</b><br>(0.13, 0.35)   | <b>-0.20</b><br>(-0.38, -0.02) | <b>-0.26</b><br>(-0.43, -0.10) | -                              |
| Lichens        | <b>2.42</b><br>(2.28, 2.57) | <b>0.26</b><br>(0.07, 0.45) | <b>-0.49</b><br>(-0.69, -0.31) | <b>0.15</b><br>(0.01, 0.29)   | -0.23<br>(-0.46, 0.01)         | <b>0.42</b><br>(0.17, 0.68)    | -                              |
| Macrofungi     | <b>4.30</b><br>(4.17, 4.42) | <b>0.17</b><br>(0.05, 0.29) | <b>-0.43</b><br>(-0.56, -0.31) | 0.04<br>(-0.06, 0.13)         | -0.10<br>(-0.25, 0.04)         | 0.11<br>(-0.05, 0.27)          | <b>-0.26</b><br>(-0.34, -0.17) |
| Spiders        | <b>3.33</b><br>(3.28, 3.38) | <b>0.14</b><br>(0.08, 0.2)  | 0.01<br>(-0.04, 0.07)          | <b>0.09</b><br>(0.04, 0.13)   | <b>-0.13</b><br>(-0.21, -0.06) | <b>-0.07</b><br>(-0.14, 0.00)  | -                              |
| Cons. Index    | <b>2.43</b><br>(2.3, 2.56)  | <b>0.26</b><br>(0.11, 0.42) | <b>-0.46</b><br>(-0.62, -0.3)  | 0.03<br>(-0.1, 0.16)          | 0.02<br>(-0.18, 0.22)          | <b>0.66</b><br>(0.44, 0.89)    | -                              |
| Eukaryote OTU  | <b>6.41</b><br>(6.36, 6.47) | 0.04<br>(-0.04, 0.11)       | 0.01<br>(-0.05, 0.08)          | <b>0.13</b><br>(0.07, 0.19)   | <b>0.10</b><br>(0.00, 0.19)    | -0.06<br>(-0.14, 0.02)         | -                              |
| Fungal OTU     | <b>5.45</b><br>(5.40, 5.51) | <b>0.15</b><br>(0.07, 0.22) | <b>-0.09</b><br>(-0.16, -0.03) | <b>-0.06</b><br>(-0.12, 0.00) | -0.01<br>(-0.10, 0.08)         | -0.05<br>(-0.13, 0.03)         | -                              |
| Malaise OTU    | <b>4.30</b><br>(4.24, 4.37) | <b>0.10</b><br>(0.03, 0.18) | <b>0.13</b><br>( 0.06, 0.19)   | 0.00<br>(-0.06, 0.06)         | 0.05<br>(-0.05, 0.14)          | -0.03<br>(-0.12, 0.05)         | -                              |

659

660



661 **FIGURES**

662 **Figure 1.** Relationships between plant species richness and species richness of other taxonomic  
663 groups, Conservation Index, and soil fungal, eukaryote and Malaise OTU richness in multiple  
664 and bivariate regressions and their 95% BCI. Stippled versus full line indicates significance and  
665 non-significance at the 0.05 level (parameter estimates whose 95% BCI did not overlap zero),  
666 respectively. For model details see Table 1.

667 **Figure 2.** Barplot of percentage variance explained by the multiple and bivariate regressions of  
668 species richness of the taxonomic groups, Conservation Index, and soil fungal, eukaryote and  
669 Malaise OTU richness. For model details see Table 1. Gastro = Gastropods, Bryoph =  
670 Bryophytes, Hover = Hoverflies, F.otu = soil fungal OTU richness, E.otu = soil eukaryote OTU  
671 richness, M.otu = Malaise OTU richness, Con.Ind. = Conservation Index.

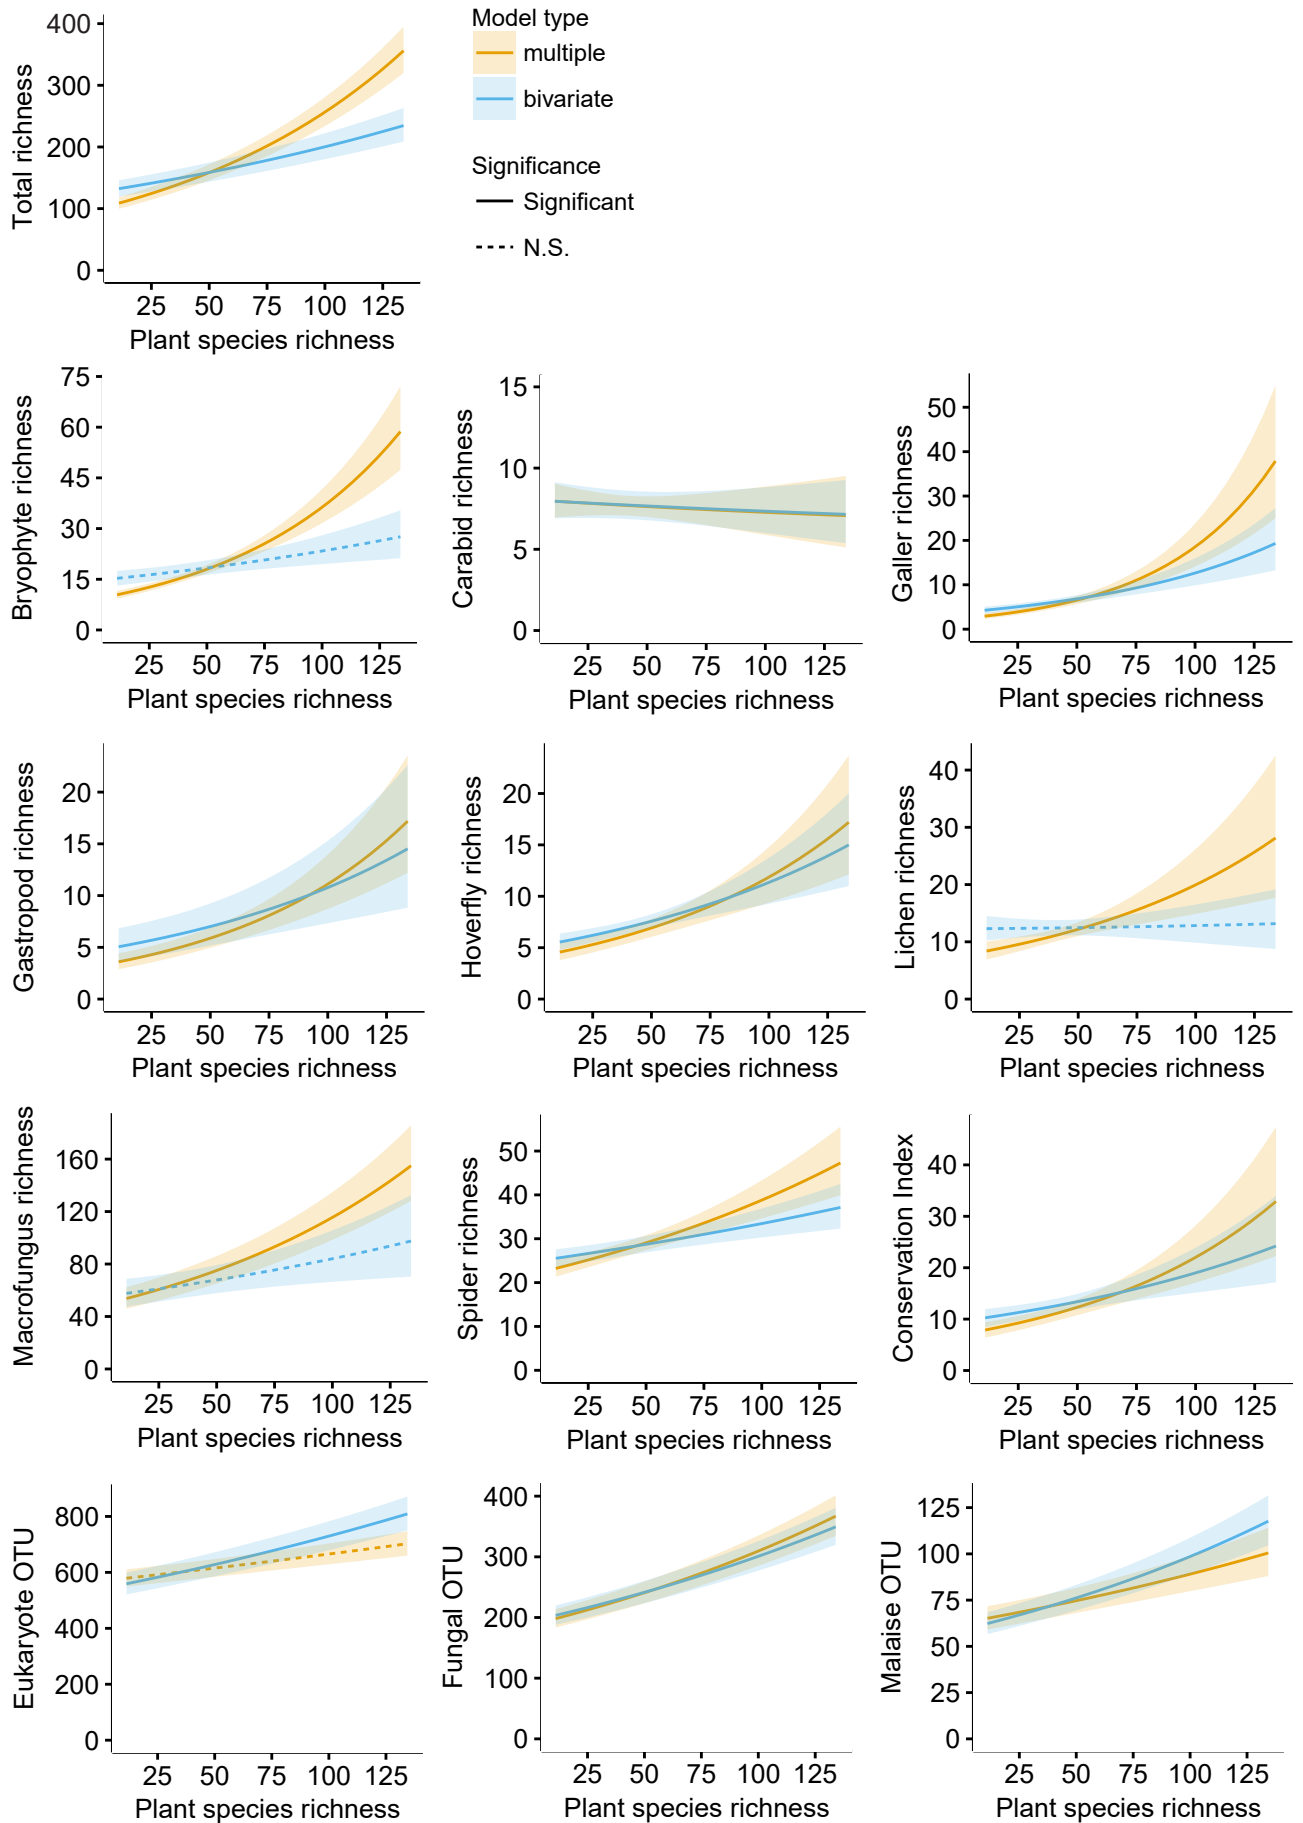

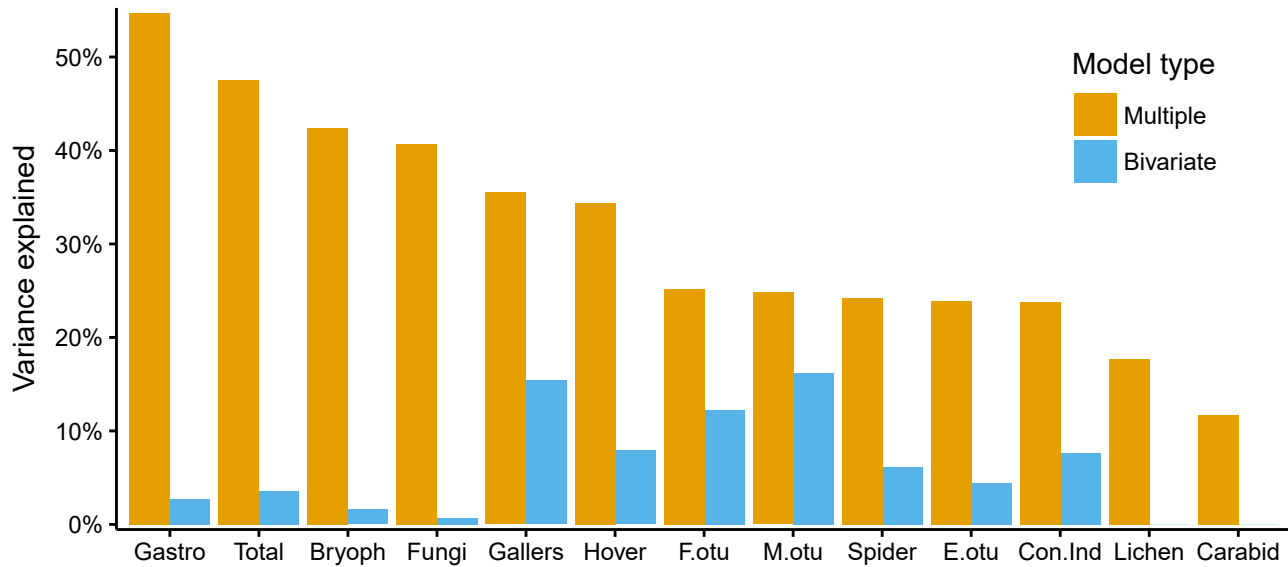

Source: https://www.biorxiv.org/content/10.1101/252999v1.full.pdf
